# Supplementary material for: Exploring artificial metalloglycosidases as selective catalysts for the recognition and degradation of the sLex tetrasaccharide
Source: Royal Society of Chemistry journal article supplement (doi:10.1039/d2nj02144g), 2022-01-01
Supplement: d2nj02144g1.pdf [file d2nj02144g1.pdf]

## Supplementary Information

### Exploring Artificial Metalloglycosidases as Selective Catalysts for the Recognition and Degradation of the sLex Tetrasaccharide

Zechariah Thompson,<sup>1</sup> Alexander J. Steed,<sup>1</sup> Jack Millot,<sup>1</sup> Yinghua Chen,<sup>2</sup> and J. A. Cowan<sup>1\*</sup>

Contribution from <sup>1</sup> Department of Chemistry and Biochemistry, The Ohio State University, 100 West 18<sup>th</sup> Avenue, Columbus, Ohio 43210; <sup>2</sup> Department of Physiology and Biophysics, Case Western Reserve University, 10900 Euclid Avenue Cleveland, OH 44106.

## EXPERIMENTAL METHODS

### Materials

All materials used were of reagent grade or higher purity standards. CuCl<sub>2</sub> was the copper salt used in all assays and obtained from Sigma Aldrich. Rink amide MBHA resin was obtained from Protein Technologies and 9-fluorenylmethoxycarbonyl (Fmoc)-amino acids were obtained from Aapptec or VWR. All *para*-nitrophenyl conjugated carbohydrates were obtained from Sigma Aldrich. Biotin-PAA-sLe<sup>x</sup>, biotin-PAA-sLe<sup>a</sup>, biotin-PAA-Le<sup>x</sup>, biotin-PAA-Le<sup>a</sup>, biotin-PAA-Le<sup>b</sup>, and biotin-PAA-Le<sup>y</sup>, were obtained from GlycoNZ, (formerly known as GlycoTech). All peptides were purified over a Phenomenex C18 semi-preparative column with an HP 1050 HPLC. LC-MS assays were performed on a Bruker Elute SP HPLC with Bruker Impact II QqTOF Mass Spectrometer equipped with a HyperCarb LC-column (4.6 x 100 mm) with 5-micron particle size. 3'-Sialyl-Lewis<sup>x</sup> tetrasaccharide was obtained from CarboSynth. α2-3,6,8

Neuraminidase (Sialidase) was obtained from New England Biolabs (NEB). Cell culture reagents were obtained from Gibco and ThermoFisher. Alexa Fluor® 488 Mouse Anti-Human CD15s (CSLEX) was obtained from BD Bioscience and Fisher Scientific.

### **Peptide Synthesis and Purification**

Peptides were synthesized by traditional Fmoc solid-phase peptide synthesis (SPPS) methodologies. Following synthesis, peptides were deprotected, cleaved, and purified via RP-HPLC. The active peptide contains a disulfide bridge, which allows for carbohydrate binding and was synthesized using traditional methods with DMSO.<sup>33</sup>

### **Surface Plasmon Resonance**

SPR studies were performed using a BIAcore T200 device (Cytiva, formerly GE Healthcare life sciences) at 25°C. The binding assay was conducted in PBS buffer, which contained 20 mM phosphate (pH 7.4), 137 mM NaCl and 2.7mM KCl, plus 0.05% Tween. All-biotinylated-PAA-carbohydrate Lewis antigens were first captured on the surface of an S series SA sensorchip at a density ranging from 350-791 RU. Next, two-fold series of peptide dilutions were then injected at a rate of 30 mL/min over surfaces using multiple cycle kinetics. Each data point was repeated at least twice. Regeneration of the surfaces were done by injection of 2M NaCl for 60s at 30uL/min. Data were fitted using steady state analysis by BIAevaluation software (version 3.1).

### **Catalyst Characterization via *para*-Nitrophenyl Assay**

Copper derivatives of peptides that show the capacity to bind carbohydrate antigen via SPR were then further evaluated by use of an absorbance assay where 5 µM metallopeptide was incubated with a derivatized-sugar that contained a *p*-nitrophenyl moiety conjugated to the anomeric carbon. The reaction mixture was incubated in 50 mM phosphate buffer at pH 7.4 at 37 °C, along with ascorbate and hydrogen peroxide to facilitate metal-mediated redox

chemistry. Liberation of *para*-nitrophenolate anion results in absorbance at 405 nm, which is an indication of successful hydrolysis and is easily monitored via UV-Vis spectroscopy. Each experiment was performed in triplicate.

### **LC-MS Degradation of sLe<sup>x</sup> Tetrasaccharide**

All LC-MS experiments were performed on a Bruker Elute SP HPLC with Bruker Impact II QqTOF Mass Spectrometer equipped with a 96-well autosampler. The ESI-MS spectra were acquired in positive mode. Dry gas source (nitrogen) was 3.0 l/min at 220 °C. A binary solvent system was used for liquid chromatography whereby A was 99 % d-H<sub>2</sub>O, 0.9 % acetonitrile, and 0.1 % formic acid, and B was 90 % acetonitrile, 9.9 % d-H<sub>2</sub>O, and 0.1 % formic acid. All solvents used for LC-assays were of LC-MS grade. All reactions were performed in 20 mM ammonium carbonate buffer, pH 8.8 at 37 °C with 2 mM ascorbic acid and 2 mM hydrogen peroxide. 50 μM Cu-peptide was incubated with either 100 μM or 150 μM sLe<sup>x</sup> tetrasaccharide. Reaction aliquots were taken every 15 min and diluted in chilled water and further analyzed by LC methodologies. A 15 μL aliquot was then taken from each time point and injected onto a HyperCarb LC-column (4.6 x 100 mm) with 5-micron particle size.<sup>34</sup> Subsequent reactant and products were separated out via a linear 4.5 % gradient of A to B and then subsequently washed with 100 % B for 2 min to further clean the column. For additional experiments to see if catalysts could be further stimulated for activity, an additional 1 mM aliquot of ascorbic acid and hydrogen peroxide was added every 45 min. Both reactant and products were quantified through the extraction of the base peak current (BPC) using MZmine.<sup>35</sup>

### **Removal of sLe<sup>x</sup> Antigen from HL-60 Cells**

HL60 cells were donated by Dr. Lapalombella from the Comprehensive Cancer Center at The Ohio State University. HL60 cells were cultured in a complete medium comprised of 80 % Iscove's Modified Dulbecco's media and 20 % fetal-bovine serum (FBS) which were obtained

from Gibco. Cells were passaged three times prior to use in cell assays. Cells were centrifuged at 100 g for 5 min and subsequently counted by a hemocytometer. Cells were resuspended in PBS buffer, pH 7.4. A sample of  $2.5 \times 10^5$  cells were treated with 25  $\mu\text{M}$  Cu-peptide, Cu-GGH, or sialidase enzyme as a positive control. Untreated cells were used as a negative control. All cells were incubated with or without 500  $\mu\text{M}$  ascorbate filtered through a 0.22  $\mu\text{m}$  filter for 4 h at 37  $^\circ\text{C}$  with a rotation speed of 125 RPM. After treatment, cells were washed 3x and fixed for 30 min by 2 % paraformaldehyde. Cells were washed 3x and blocked by 1 % bovine serum albumin (BSA) for 30 min, cells were washed with PBS buffer with 0.1 % BSA and stained with 5  $\mu\text{L}$  of CSLEX1 antibody from BD Biosciences. Cells were rinsed 3x again and resuspended in 0.1 % BSA and counted on an Aria III flow cytometer equipped with a laser with an excitation of 488 nm. Positive and negative cells were gated, and  $2 \times 10^4$  cells were counted. Cells which were not treated, nor stained, were background subtracted for cellular autofluorescence. Each experiment was performed in triplicate and the error bars represent the standard deviation.

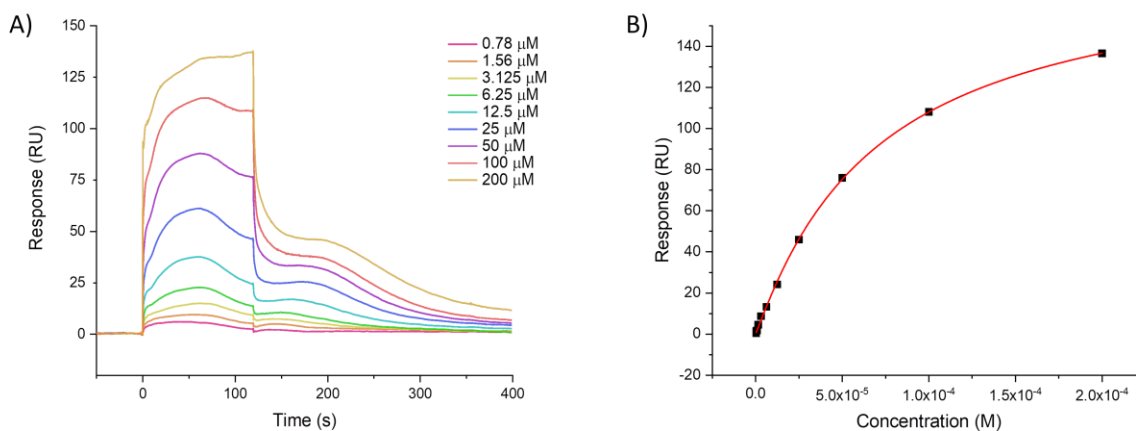

**Figure S1.** Binding curves for ATCUN-t-OL peptide against biotinylated-sLe<sup>X</sup>. A) SPR sensorgram and B) Response units were plotted against peptide concentration. Affinity was calculated using the fitting tool of BiaEvaluation software.

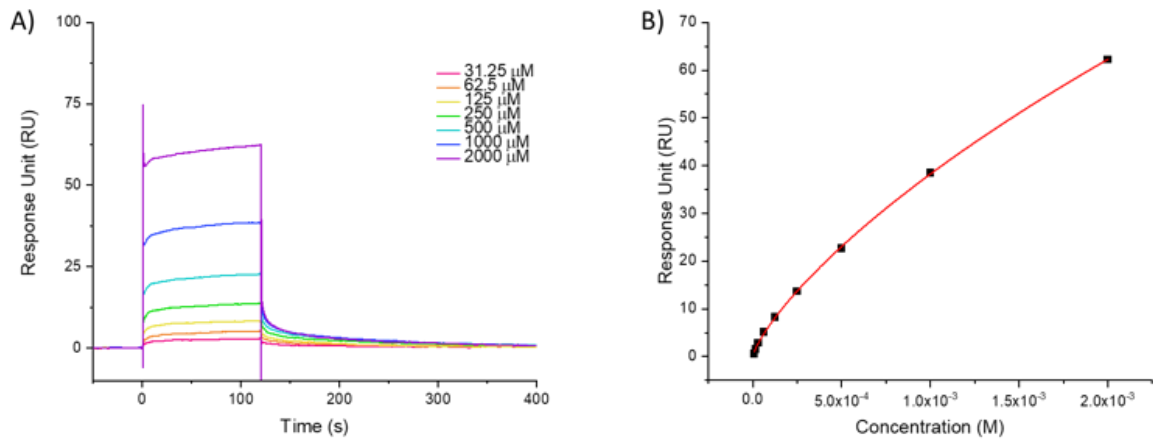

**Figure S2.** Binding curves for ATCUN-t-OL peptide against biotinylated-sLe<sup>a</sup>. A) SPR sensorgram and B) Response units were plotted against peptide concentration. Affinity was calculated using the fitting tool of BiaEvaluation software.

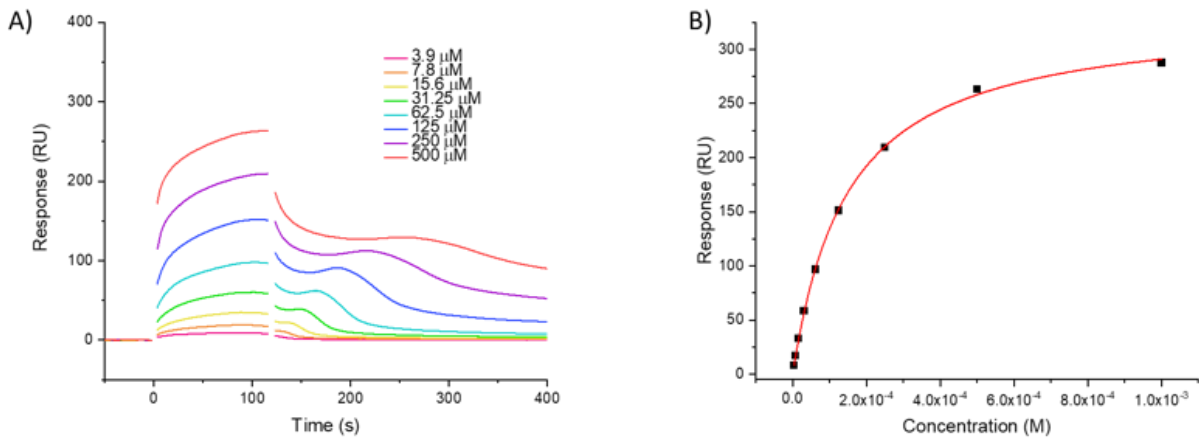

**Figure S3.** Binding curves for ATCUN-t-OL peptide against biotinylated-Le<sup>a</sup>. A) SPR sensorgram and B) Response units were plotted against peptide concentration. Affinity was calculated using the fitting tool of BiaEvaluation software.

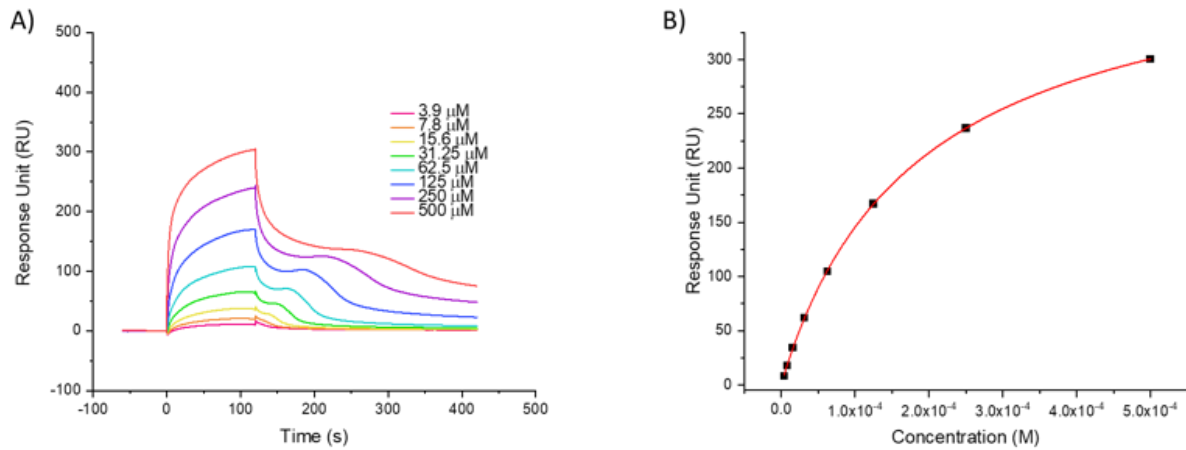

**Figure S4.** Binding curves for ATCUN-t-OL peptide against biotinylated-Le<sup>Y</sup>. A) SPR sensorgram and B) Response units were plotted against peptide concentration. Affinity was calculated using the fitting tool of BiaEvaluation software.

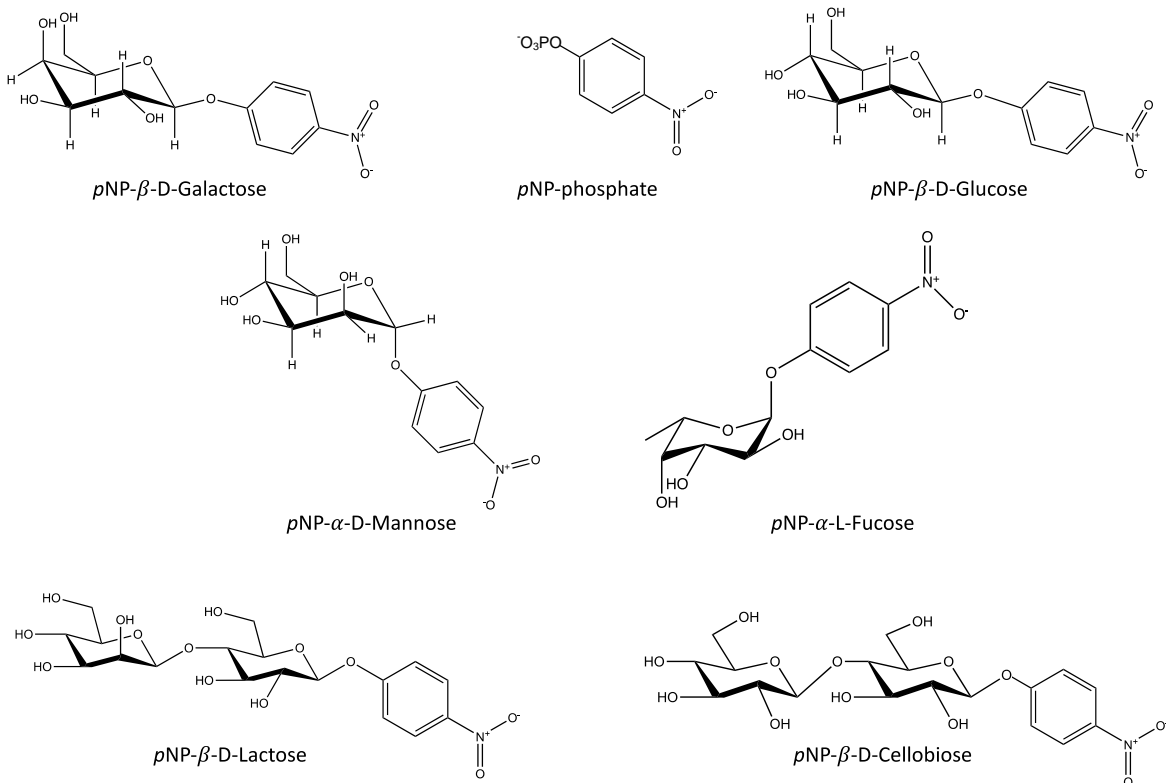

**Figure S5.** Para-nitrophenyl conjugated carbohydrates used for kinetic assays.

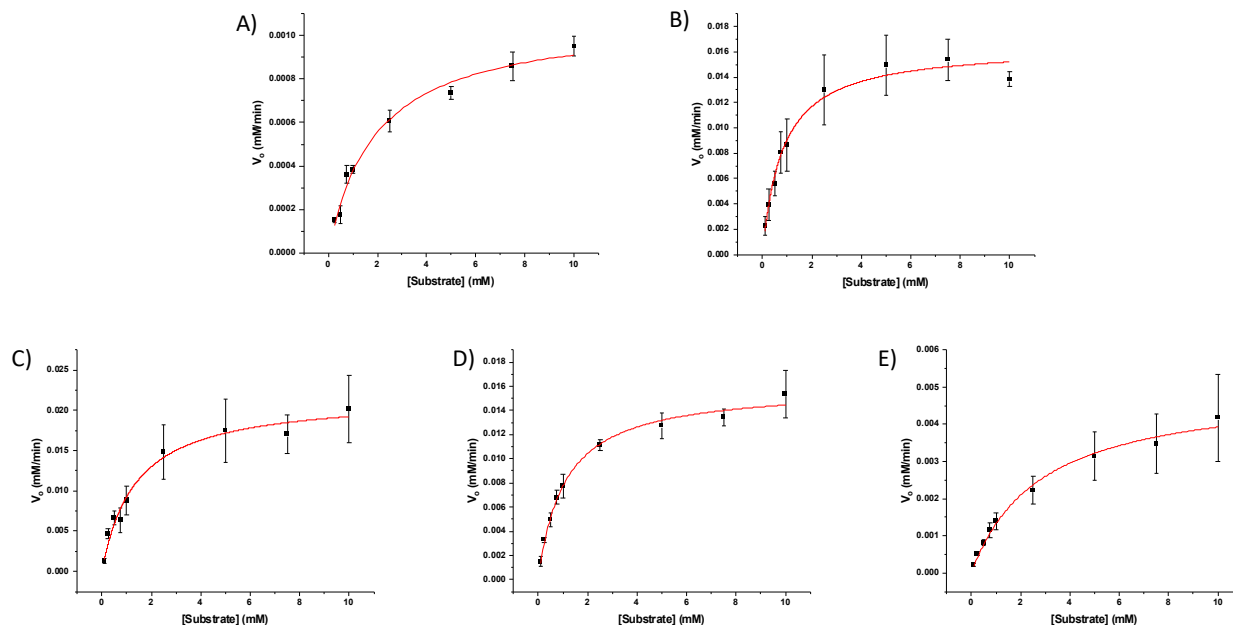

**Figure S6.** Compiled para-nitrophenyl assay data for ATCUN-t-OL peptide. A) pNP-phosphate, B) pNP-beta-galactose, C) pNP-alpha-mannose, D) pNP-beta-lactose, E) pNP-beta-cellulose. All assays were performed in 50 mM sodium phosphate buffer, pH 7.4, with 1 mM ascorbic acid, 1 mM hydrogen peroxide, and 5  $\mu$ M Cu-catalyst.

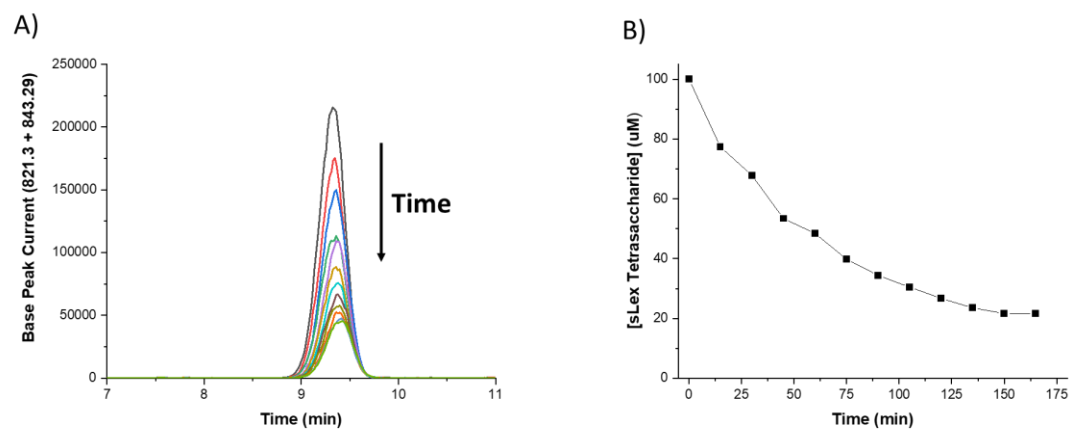

**Figure S7.** Base Peak Current (BPC) for sLe<sup>x</sup> Degradation A) Sialidase reaction BPC chromatograms for 100  $\mu$ M sLex tetrasaccharide. B) Reaction progress over time. 100  $\mu$ M for sLe<sup>x</sup> tetrasaccharide, 200 U sialidase, 50 mM ammonium acetate buffer, pH 5.5.

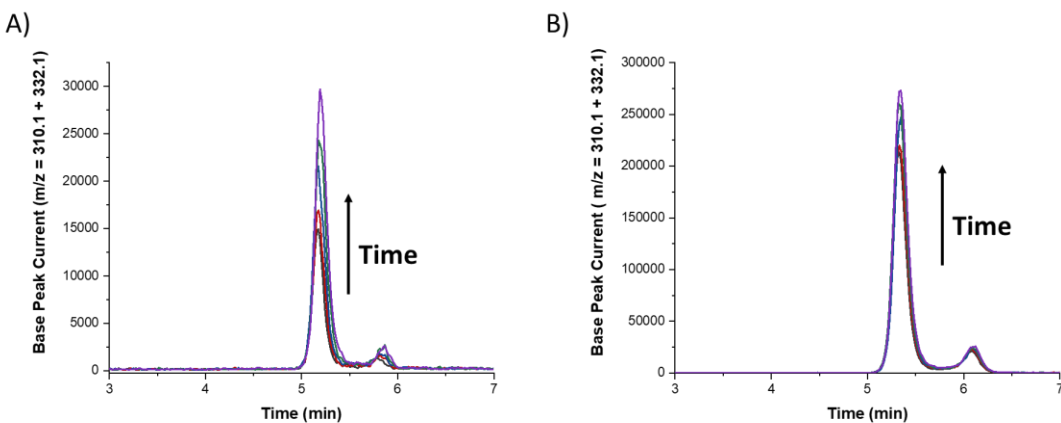

**Figure S8.** Base Peak Current (BPC) for Sialic Acid Product Detection. A) BPC results for sialic acid over 60 minutes for a 50  $\mu\text{M}$  reaction of Cu-ATCUN-t-OL-2 with 100  $\mu\text{M}$  sLe<sup>x</sup> tetrasaccharide, B) BPC results for sialic acid over 60 minutes for a 200 enzyme U reaction of sialidase enzyme with 100  $\mu\text{M}$  sLe<sup>x</sup> tetrasaccharide.

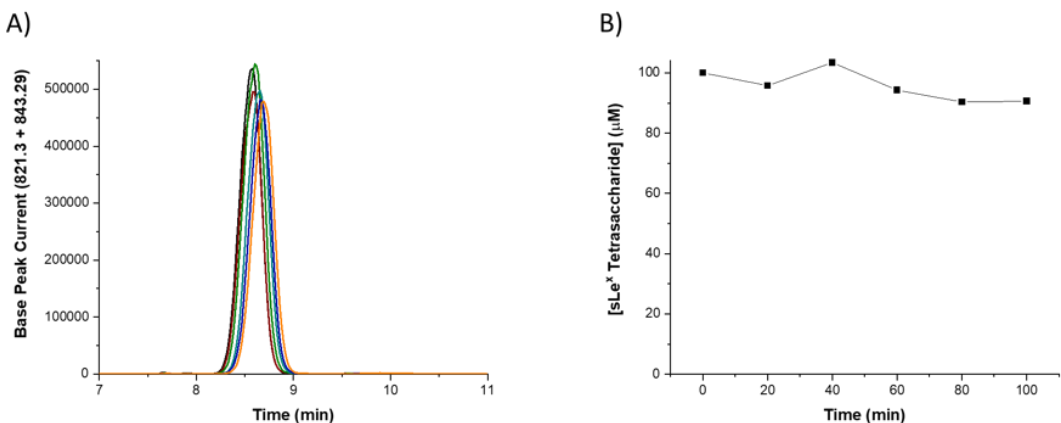

**Figure S9.** Base Peak Current (BPC) for sLe<sup>x</sup> Degradation A) Control reaction BPC chromatograms for 100  $\mu\text{M}$  sLe<sup>x</sup> tetrasaccharide. B) Reaction progress over time. 100  $\mu\text{M}$  for sLe<sup>x</sup> tetrasaccharide, no copper catalyst, 2 mM ascorbic acid, 2 mM hydrogen peroxide, 20 mM ammonium carbonate buffer, pH = 8.8.



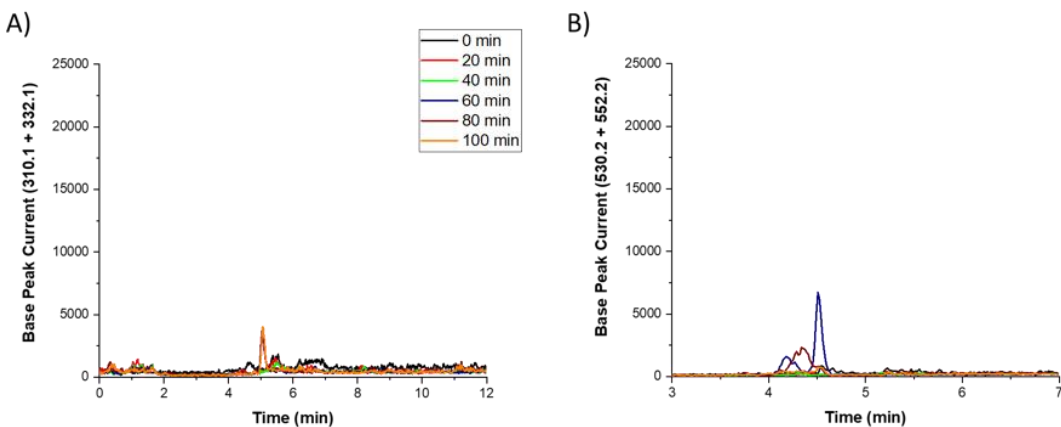

**Figure S10.** Base Peak Current (BPC) for sialic acid and Le<sup>x</sup> detection in a control reaction A) BPC for sialic acid from 0 to 100 min. B) BPC for Le<sup>x</sup> from 0 to 100 min.

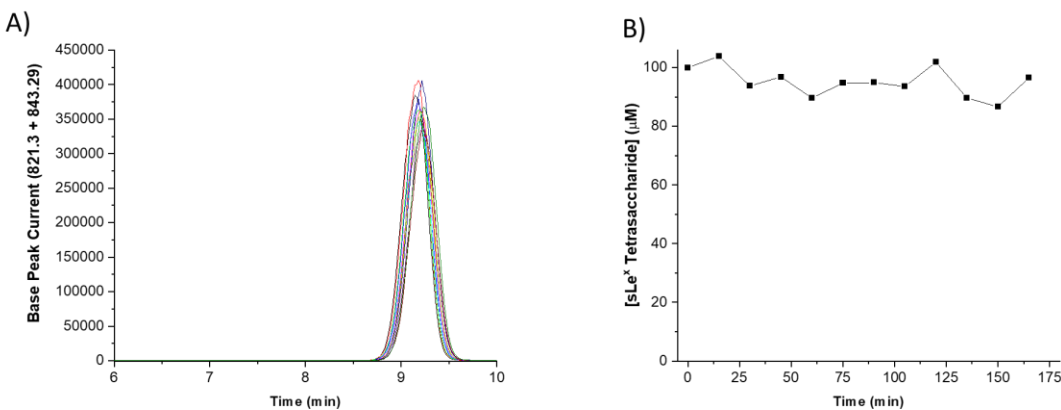

**Figure S11.** Base Peak Current (BPC) for sLe<sup>x</sup> Degradation A) 50 μM Cu-GGH tripeptide reaction BPC chromatograms for 100 μM sLe<sup>x</sup> tetrasaccharide. B) Reaction progress over time. 100 μM for sLe<sup>x</sup> tetrasaccharide, 50 μM Cu-GGH, 2 mM ascorbic acid, 2 mM hydrogen peroxide, 20 mM ammonium carbonate buffer, pH = 8.8.

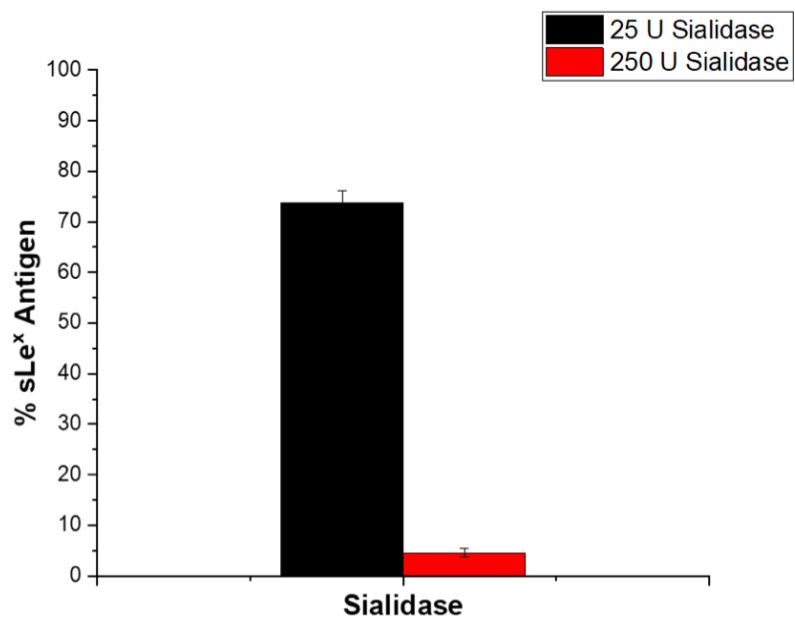

**Figure S12.** sLe<sup>x</sup> Antigen Removal from HL-60 Cells by  $\alpha$ 2-3,6,8 Sialidase. sLe<sup>x</sup> antigen concentration dependence for sialidase enzyme 25 U (black) or 250 U (red).
